# Supplementary material for: Glycopeptides derived from glucosaminic acid
Source: Royal Society of Chemistry journal article supplement (doi:10.1039/c6py00858e), 2016-01-01
Supplement: c6py00858e1.pdf [file c6py00858e1.pdf]

## Glycopeptides Derived from Glucosaminic Acid

Ester Abtew<sup>†</sup>, Abraham J Domb\*, and Arijit Basu\*

*Institute of Drug Research, School of Pharmacy-Faculty of Medicine, The Hebrew University of Jerusalem, Jerusalem, Israel 91120*

### List of Figures

|                                                                                                                                                                                                     |    |
|-----------------------------------------------------------------------------------------------------------------------------------------------------------------------------------------------------|----|
| Figure 1. <sup>1</sup> H NMR of δ-gluconolactone (1). .....                                                                                                                                         | 2  |
| Figure 2. Top <sup>1</sup> H NMR and bottom <sup>13</sup> C NMR for methyl 3,4;5,6-di-O-isopropylidene-D-gluconate (2). .....                                                                       | 3  |
| Figure 3. ESI MS (positive ionization mode) for methyl 3,4;5,6-di-O-isopropylidene-D-gluconate (2) .....                                                                                            | 4  |
| Figure 4. Top <sup>1</sup> H NMR and bottom <sup>13</sup> C NMR for methyl 3,4;5,6-di-O-isopropylidene-2-azido-2-deoxy-D-mannate (3). .....                                                         | 5  |
| Figure 5. Overlay of FTIR spectra revealing the conversion of Azide (compound 3, 2100 cm <sup>-1</sup> correspond to azide) to amine (compound 4). .....                                            | 6  |
| Figure 6. <sup>1</sup> H NMR spectra of methyl 3,4;5,6-di-O-isopropylidene-2-amino-2-deoxy-D-mannate (4). .....                                                                                     | 7  |
| Figure 7. Top <sup>1</sup> H NMR and bottom ESI MS (positive ionization mode) for methyl 3,4;5,6-di-O-isopropylidene-2-(Boc-amino)-2-deoxy-D-mannate(5). .....                                      | 8  |
| Figure 8. Top <sup>1</sup> H NMR and bottom <sup>13</sup> C NMR for methyl 3,4;5,6-di-O-isopropylidene-2-azido-2-deoxy-D-mannate (3). .....                                                         | 9  |
| Figure 9. Overlay of FTIR spectra revealing the conversion to N-carboxyanhydride -compound 6 to compound 7 (1790 and 1820 cm <sup>-1</sup> , correspond to -C=O, oxazolidine-2,5-dione). .....      | 10 |
| Figure 10. Top <sup>13</sup> C NMR and bottom <sup>1</sup> H NMR for 4-(2,2,6,6-tetramethyltetrahydro-[1,3]dioxino[5,4-d][1,3]dioxin-4-yl)oxazolidine-2,5-dione (7). .....                          | 11 |
| Figure 11. <sup>1</sup> H NMR of the acetonide protected polymer compound (8). .....                                                                                                                | 12 |
| Figure 12. HSQC NMR spectrum of the acetonide protected polymer compound (8) .....                                                                                                                  | 13 |
| Figure 13. Overlay of FTIR spectra revealing the conversion of N-carboxyanhydride -compound 7 to the acetonide protected polymer compound 8 (1600, 1620 cm <sup>-1</sup> (-CONH-, polyamide). ..... | 14 |
| Figure 14. <sup>1</sup> H NMR of the de-protected polymer compound (9). .....                                                                                                                       | 15 |
| Figure 15. Representative DSC thermograph of poly glucosaminic acid. ....                                                                                                                           | 16 |

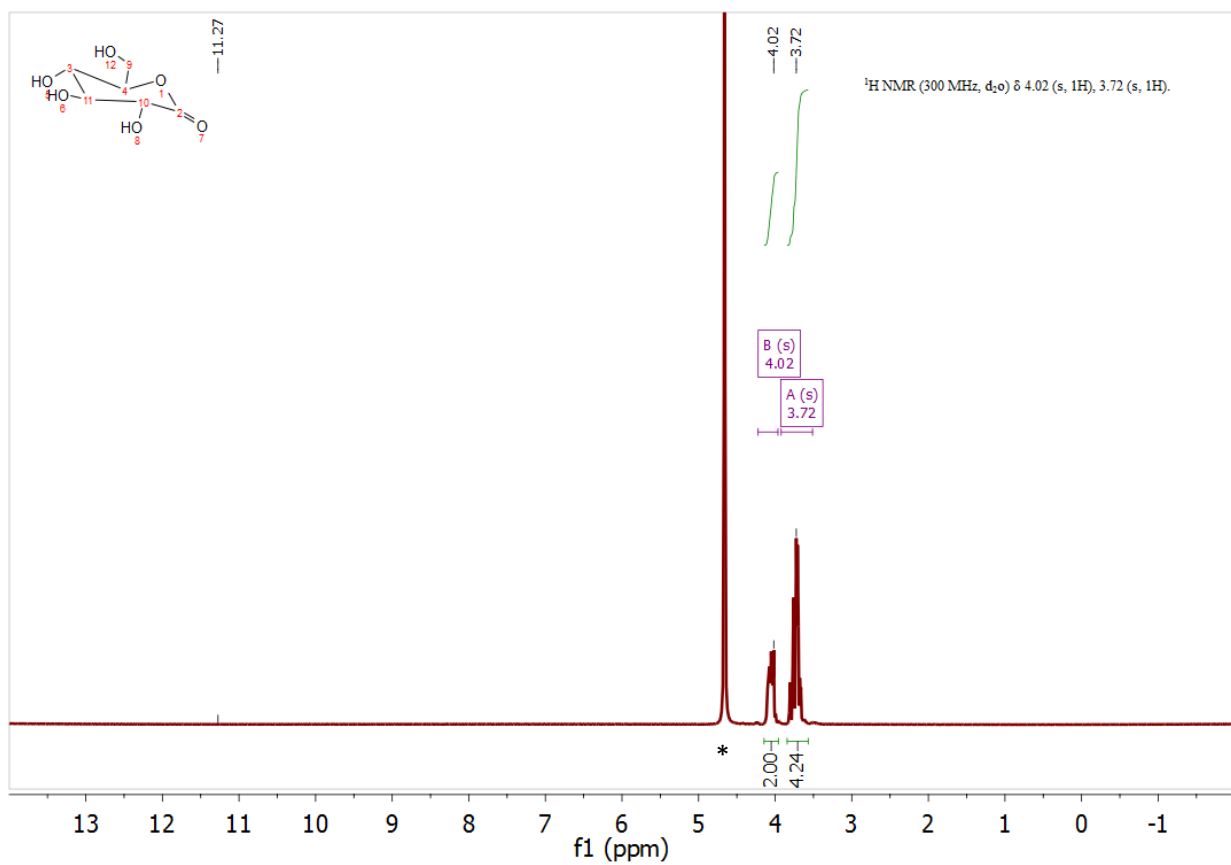

**Figure 1.** <sup>1</sup>H NMR of δ-gluconolactone (1).

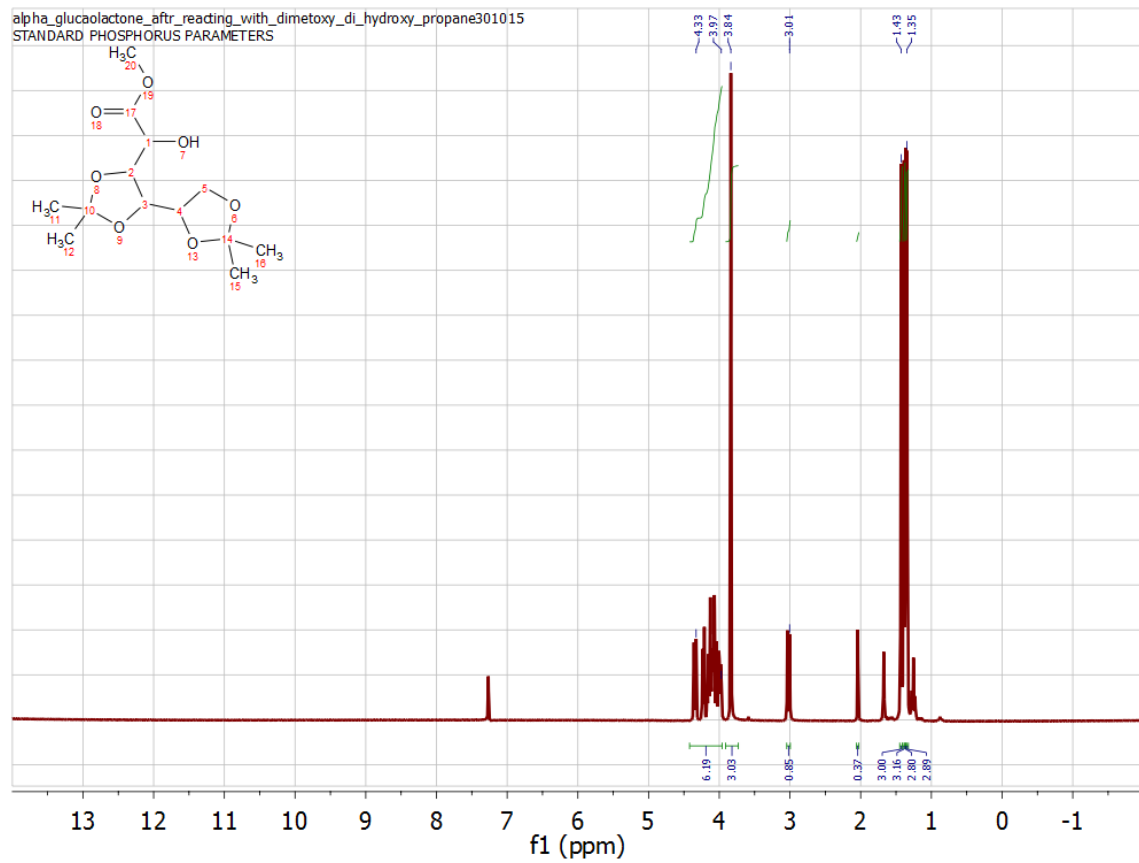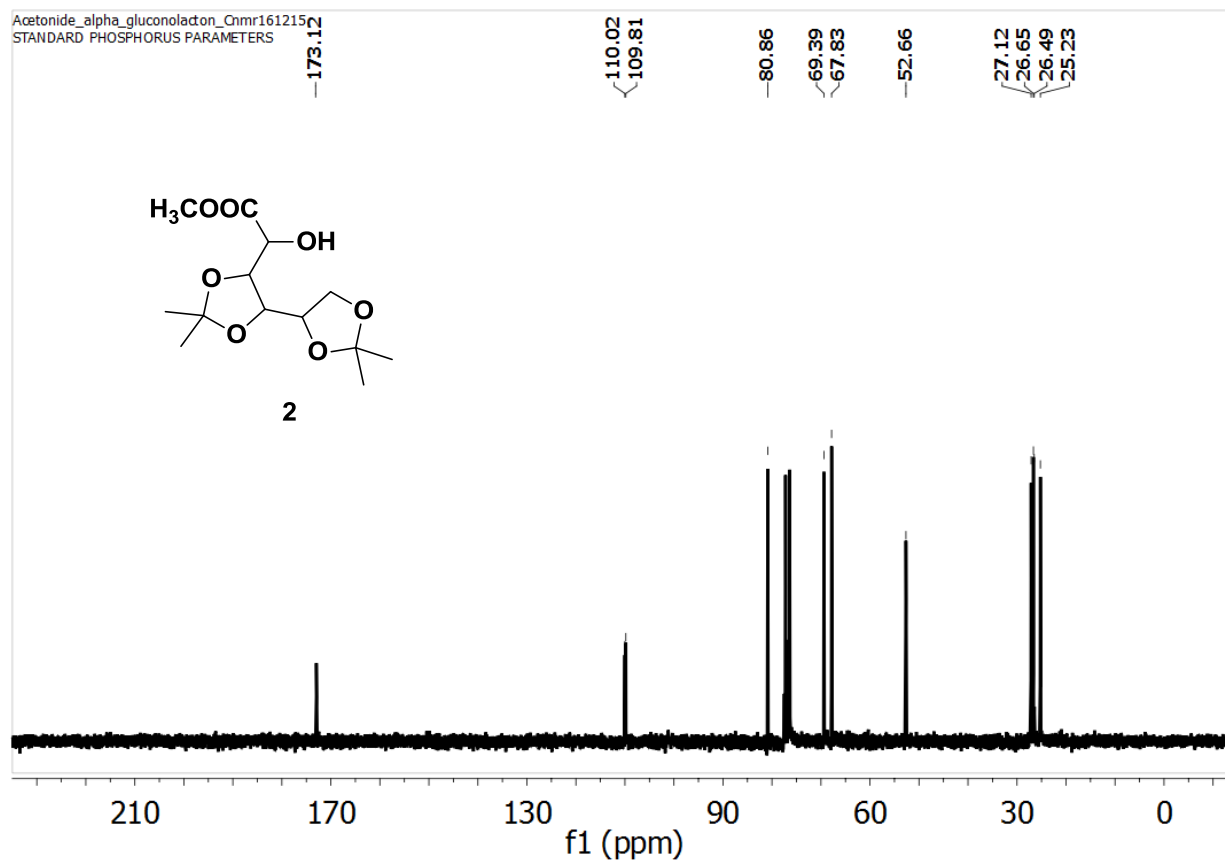

**Figure 2.** Top <sup>1</sup>H NMR and bottom <sup>13</sup>C NMR for methyl 3,4,5,6-di-O-isopropylidene-D-gluconate (2).

positive

AD-234 #56-92 RT: 0.50-0.82 AV: 37 SB: 12 0.21-0.31 NL: 2.09E8

T: + p ESI Q1MS [150.070-800.000]

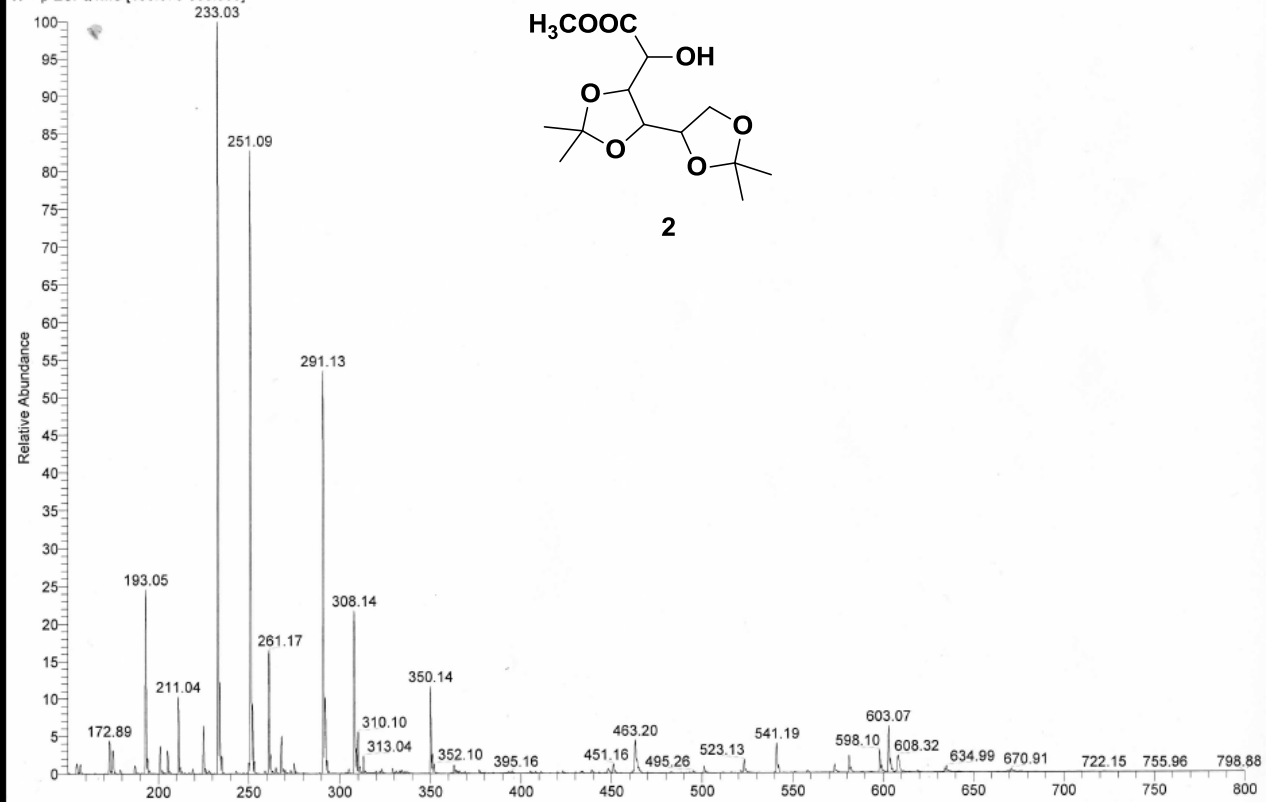

**Figure 3.** ESI MS (positive ionization mode) for methyl 3,4,5,6-di-O-isopropylidene-D-gluconate (2)

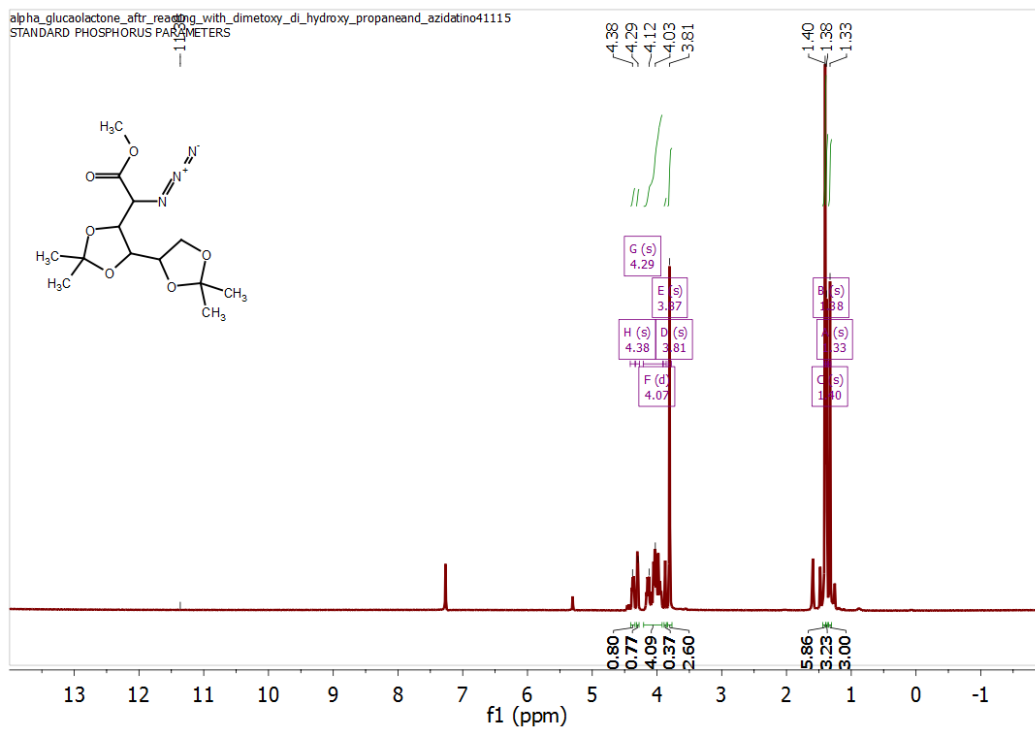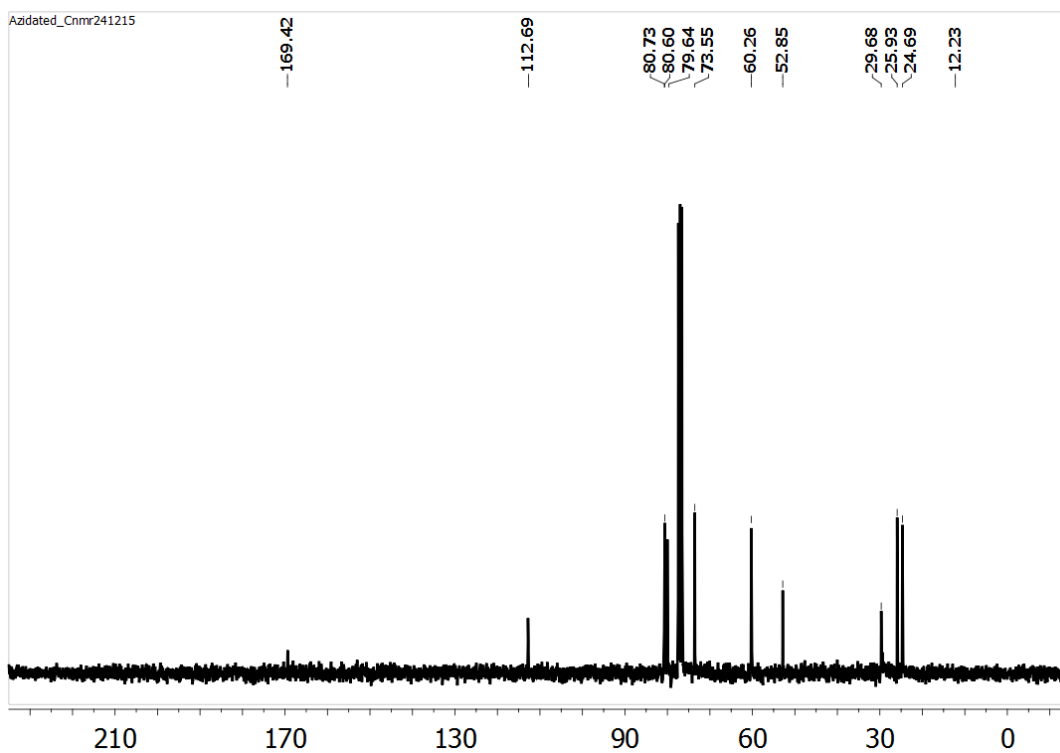

**Figure 4.** Top  $^1\text{H}$  NMR and bottom  $^{13}\text{C}$  NMR for methyl 3,4,5,6-di-O-isopropylidene-2-azido-2-deoxy-D-mannate (**3**).

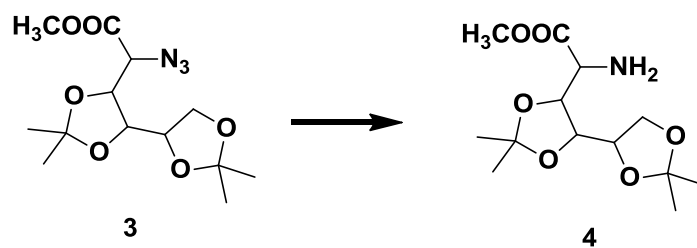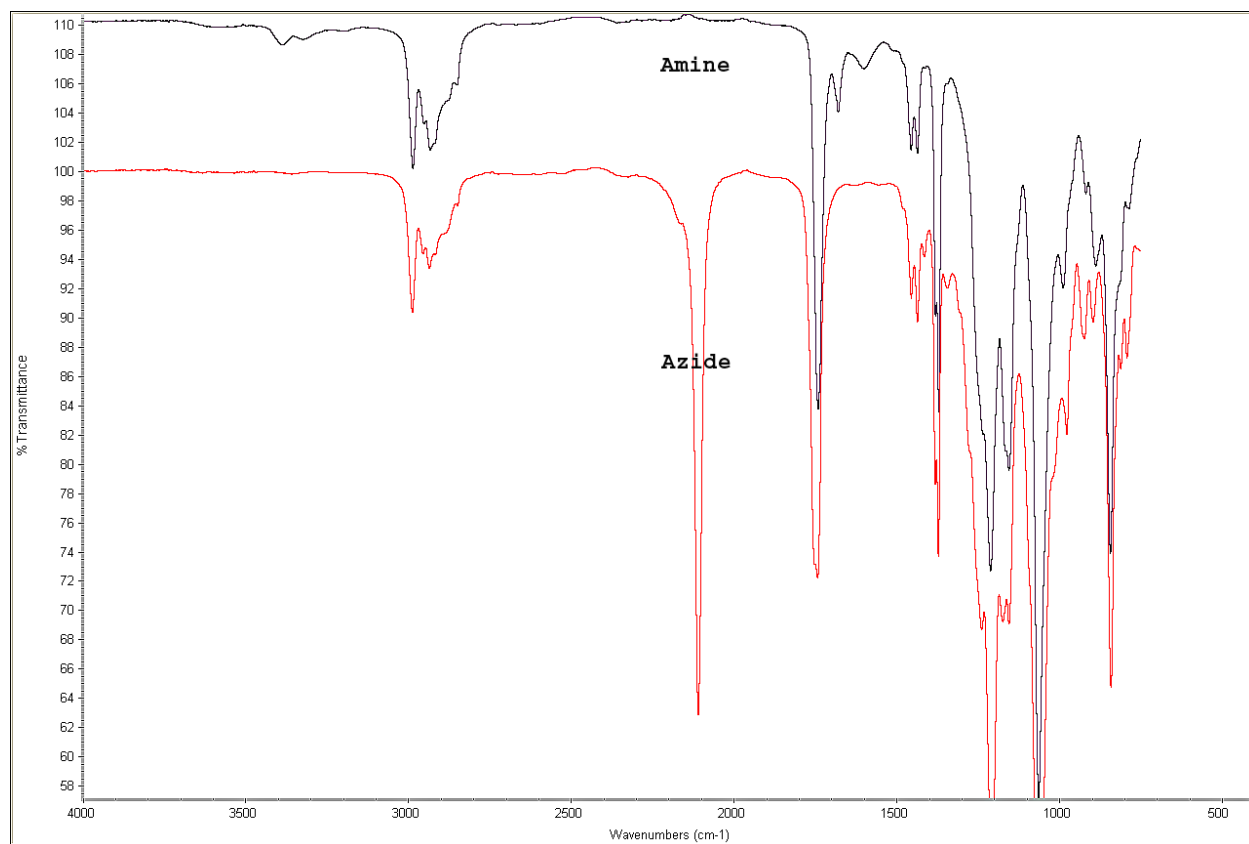

**Figure 5.** Overlay of FTIR spectra revealing the conversion of Azide (compound **3**,  $2100 \text{ cm}^{-1}$  correspond to azide) to amine (compound **4**).

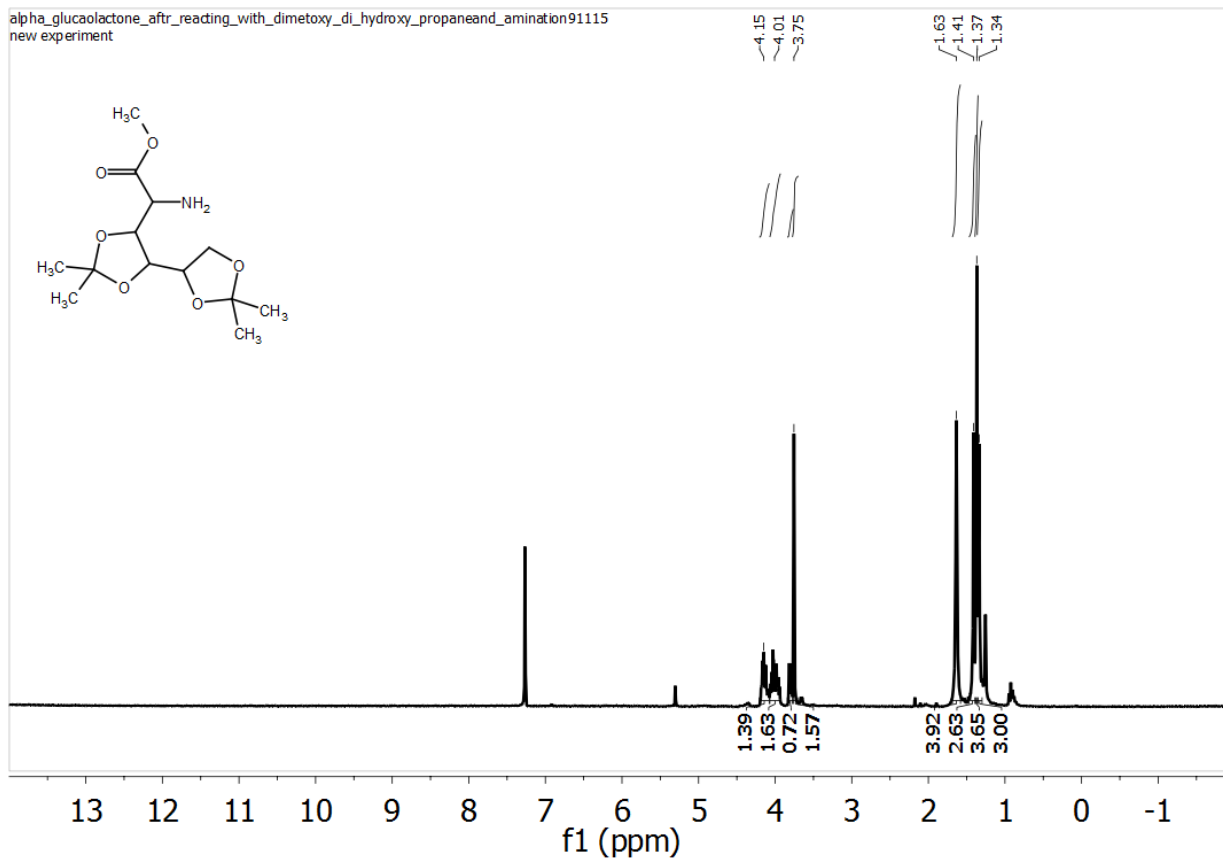

**Figure 6.**  $^1\text{H}$  NMR spectra of methyl 3,4,5,6-di-O-isopropylidene-2-amino-2-deoxy-D-mannate (4).

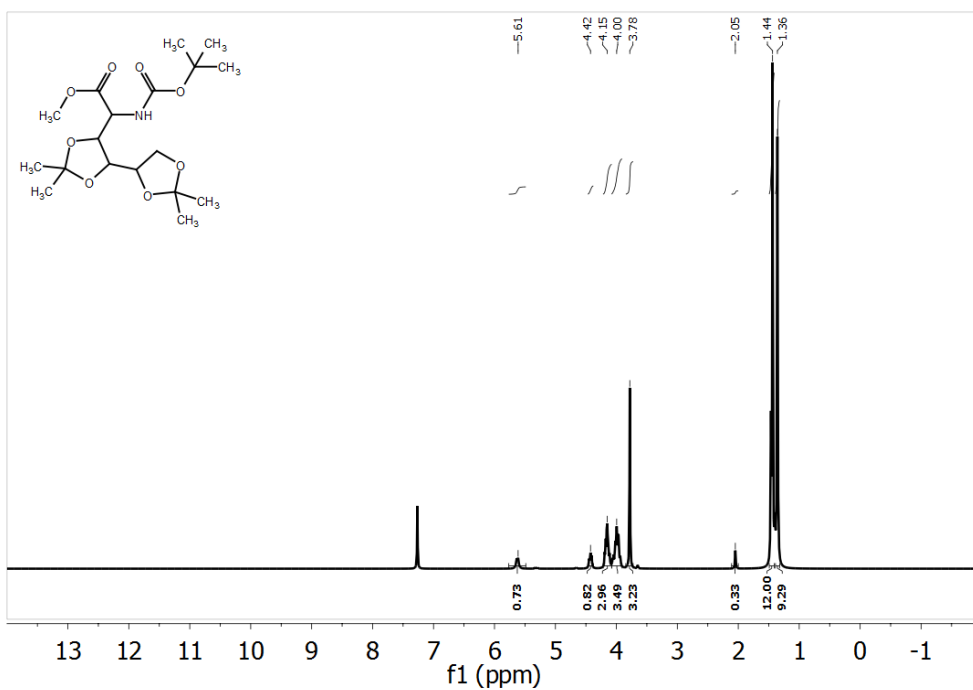

positive  
 AD-236 #106-134 RT: 0.95-1.21 AV: 29 SB: 18 0.13-0.28 NL: 1.46E8  
 T: + p ESI Q1MS [150.070-900.000]

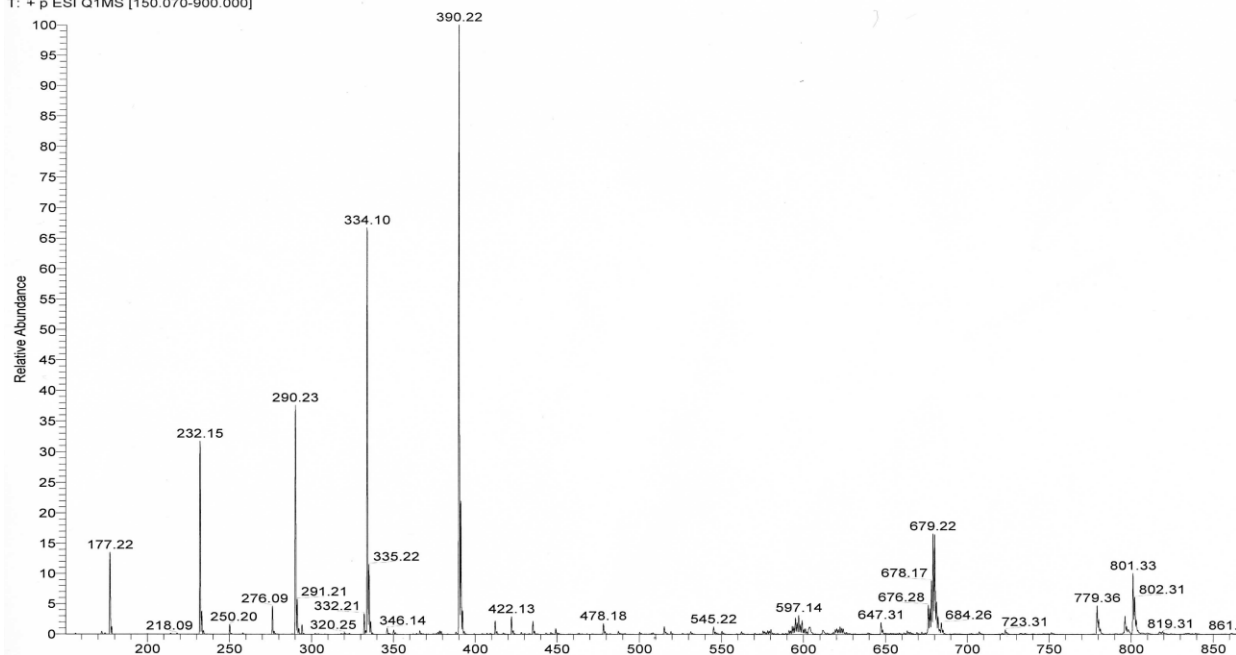

**Figure 7.** Top <sup>1</sup>H NMR and bottom ESI MS (positive ionization mode) for methyl 3,4,5,6-di-O-isopropylidene-2-(Boc-amino)-2-deoxy-D-mannate(**5**).



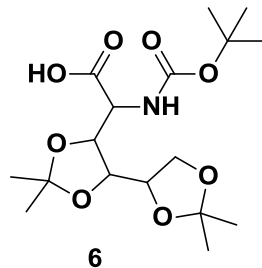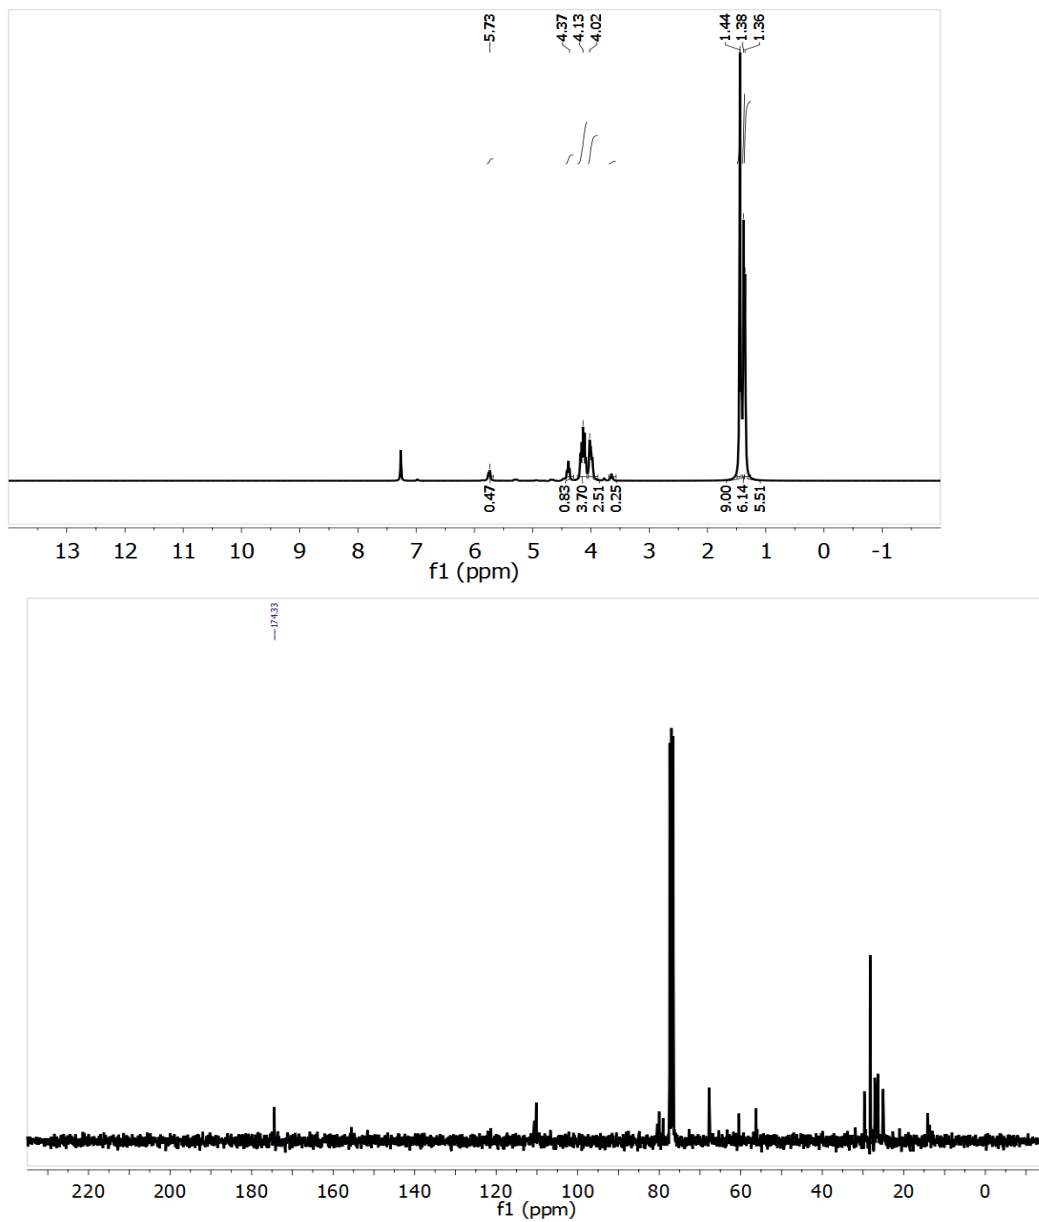

**Figure 8.** Top  $^1\text{H}$  NMR and bottom  $^{13}\text{C}$  NMR for methyl 3,4;5,6-di-O-isopropylidene-2-azido-2-deoxy-D-mannate (**3**).

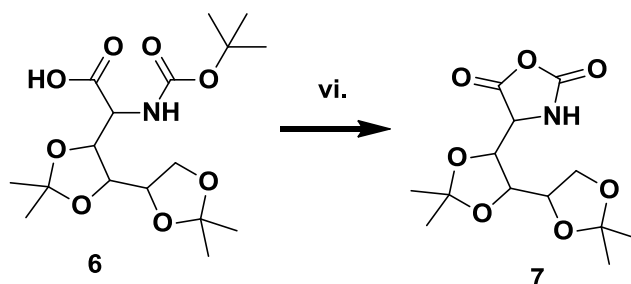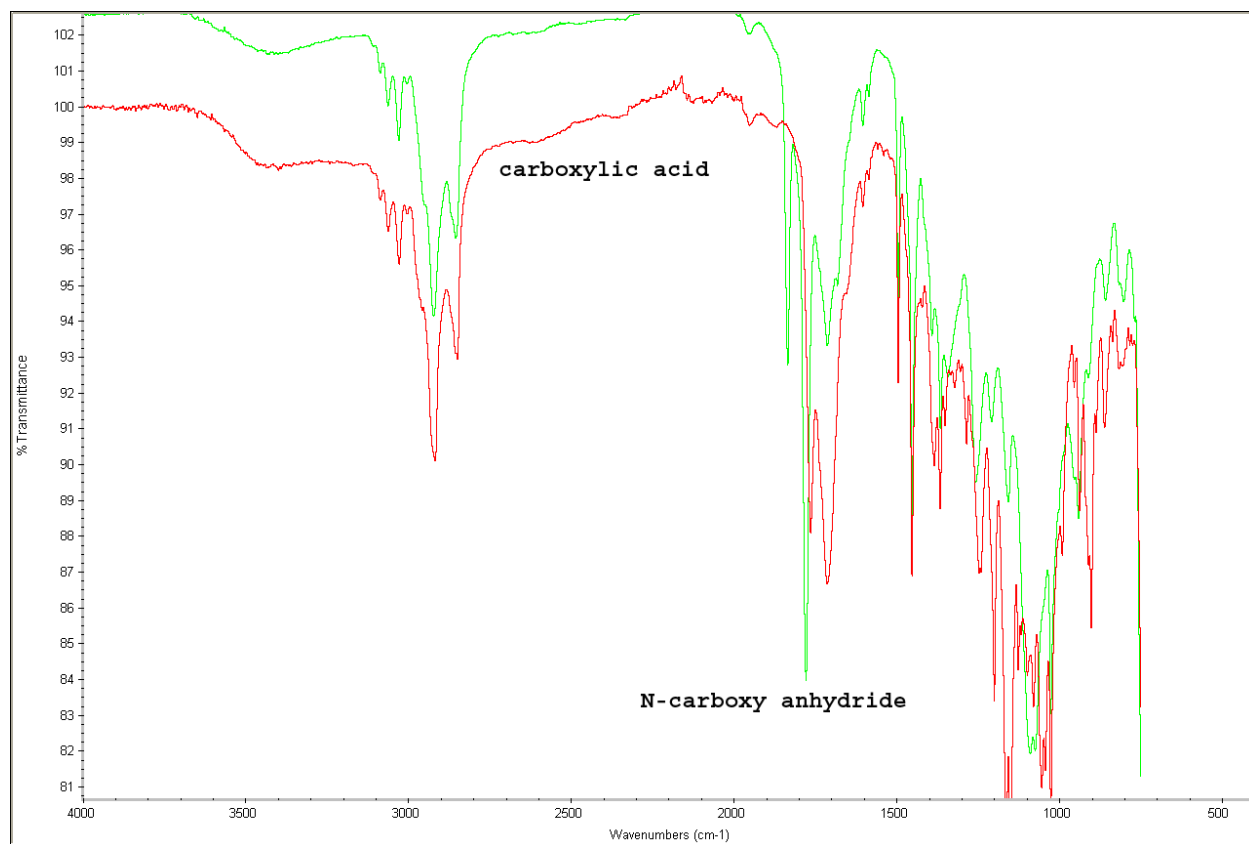

**Figure 9.** Overlay of FTIR spectra revealing the conversion to N-carboxyanhydride -compound **6** to compound **7** ( $1790$  and  $1820\text{ cm}^{-1}$ , correspond to  $\text{-C=O}$ , oxazolidine-2,5-dione).

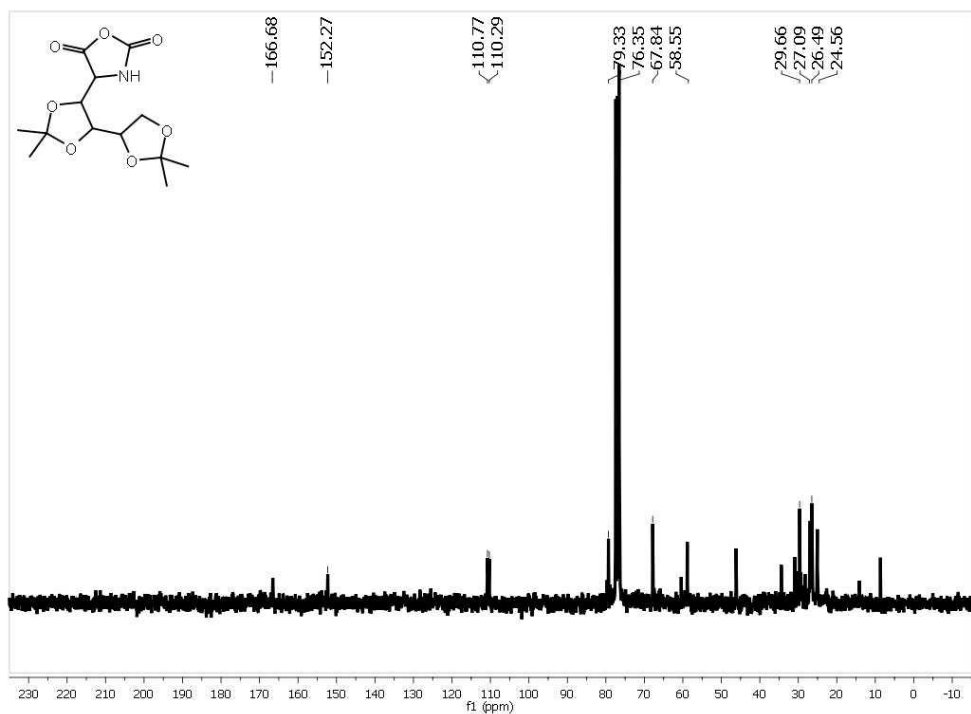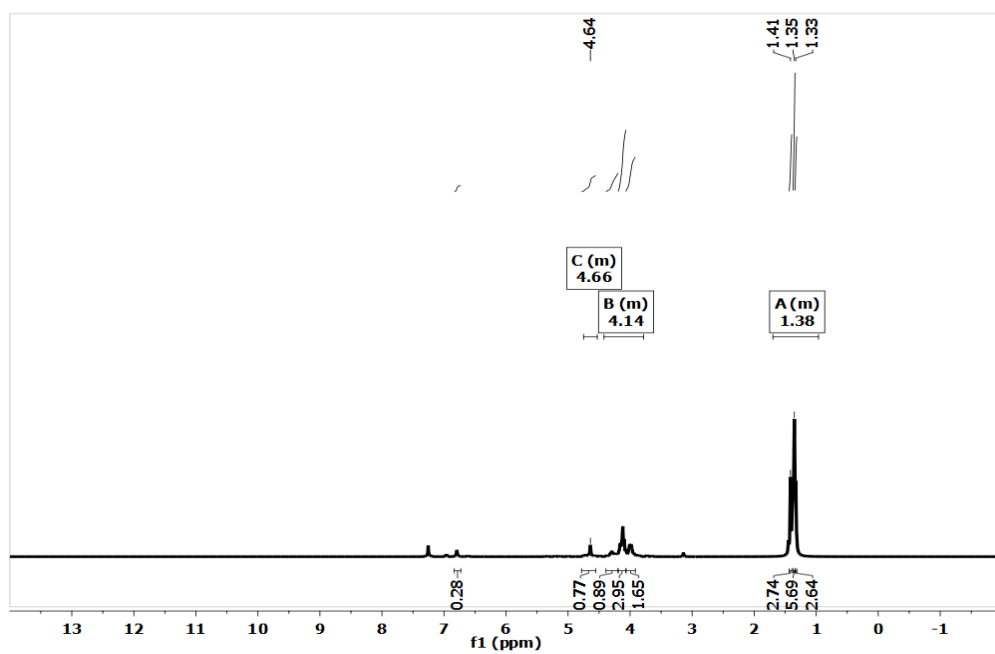

**Figure 10.** Top  $^{13}\text{C}$  NMR and bottom  $^1\text{H}$  NMR for 4-(2,2,6,6-tetramethyltetrahydro[1,3]dioxino[5,4-d][1,3]dioxin-4-yl)oxazolidine-2,5-dione (**7**).



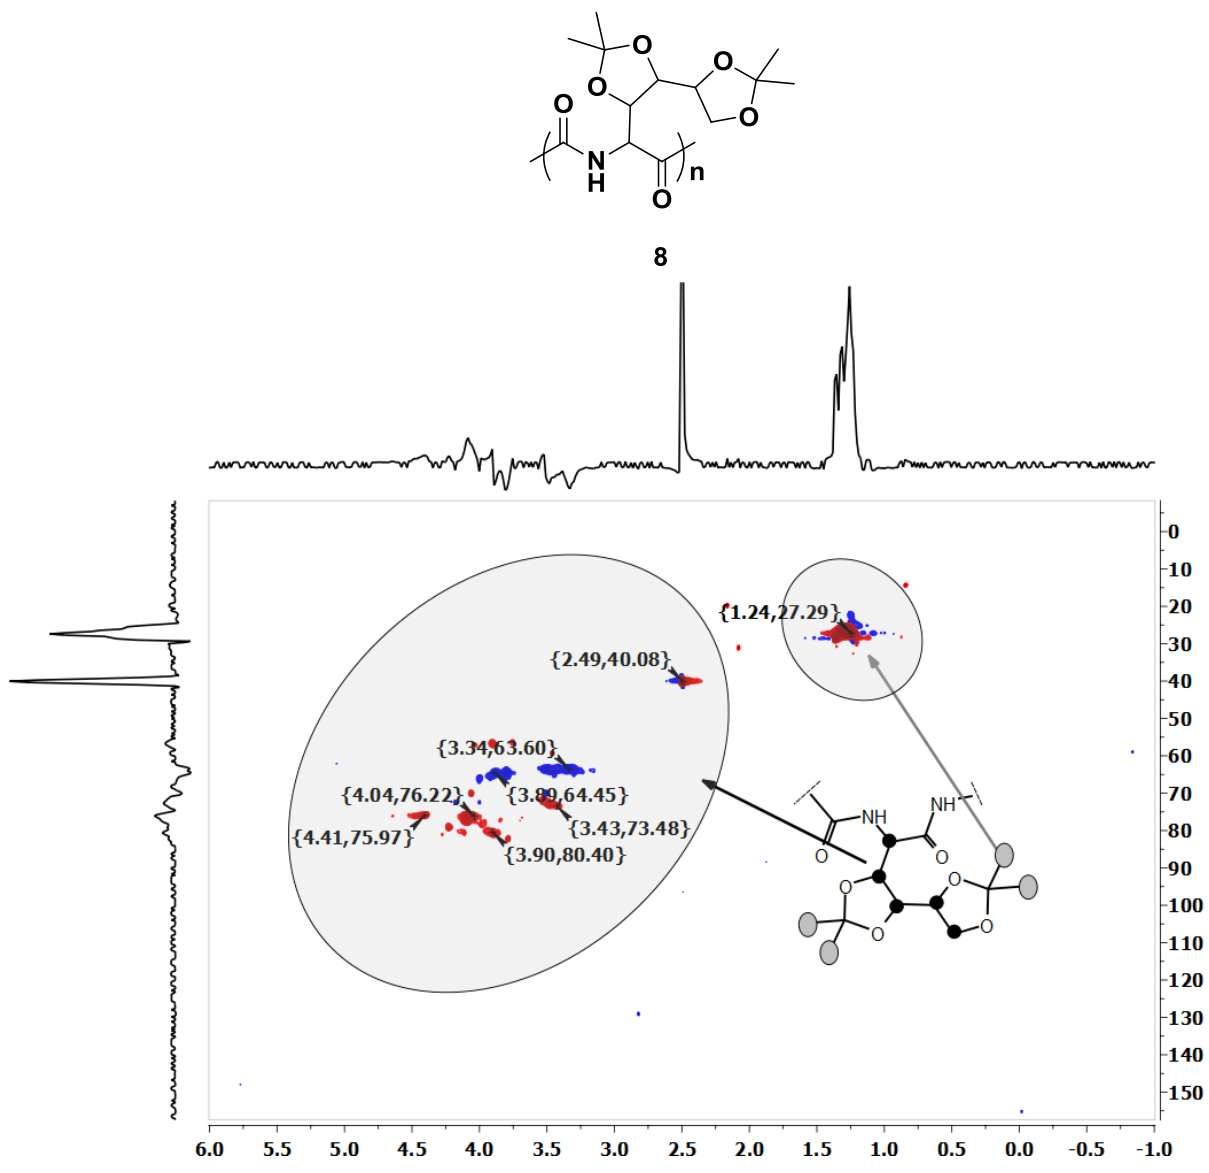

**Figure 12.** HSQC NMR spectrum of the acetonide protected polymer compound (8)

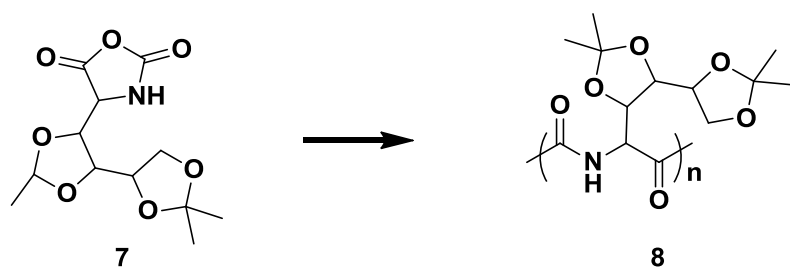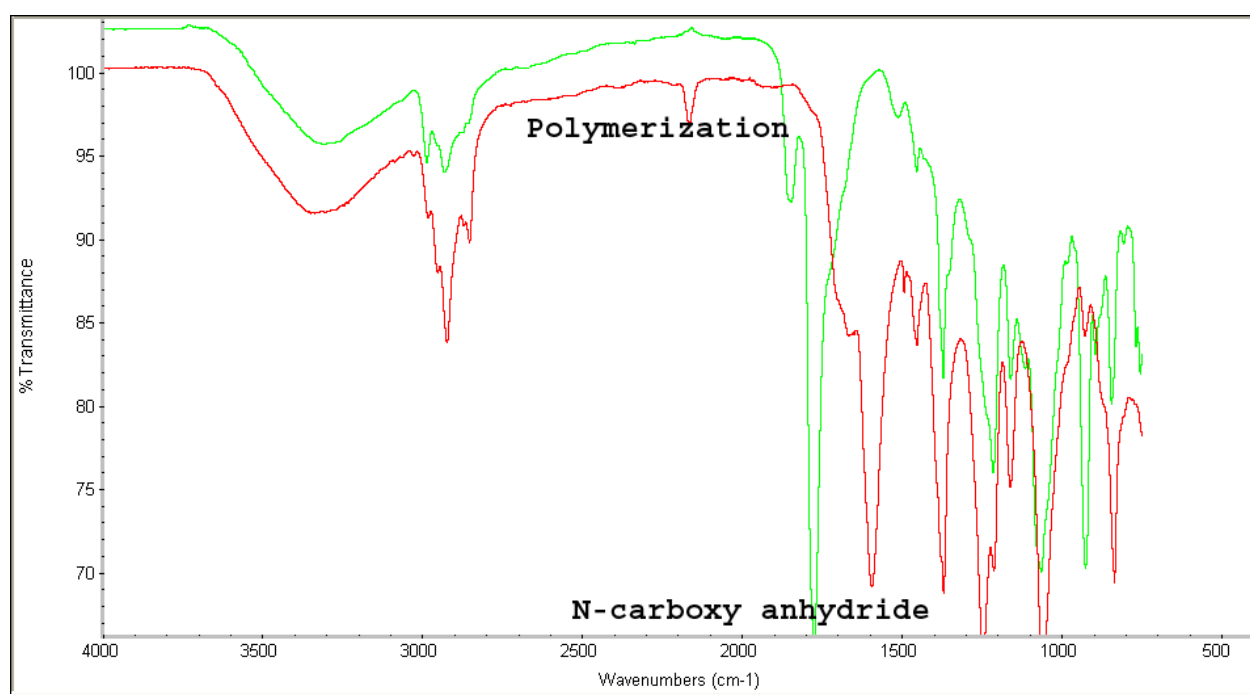

**Figure 13.** Overlay of FTIR spectra revealing the conversion of N-carboxyanhydride -compound 7 to the acetonide protected polymer compound 8 ( $1600, 1620\text{ cm}^{-1}$  (-CONH-, polyamide).

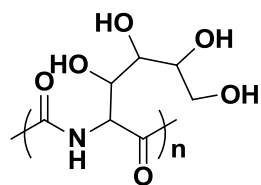

9

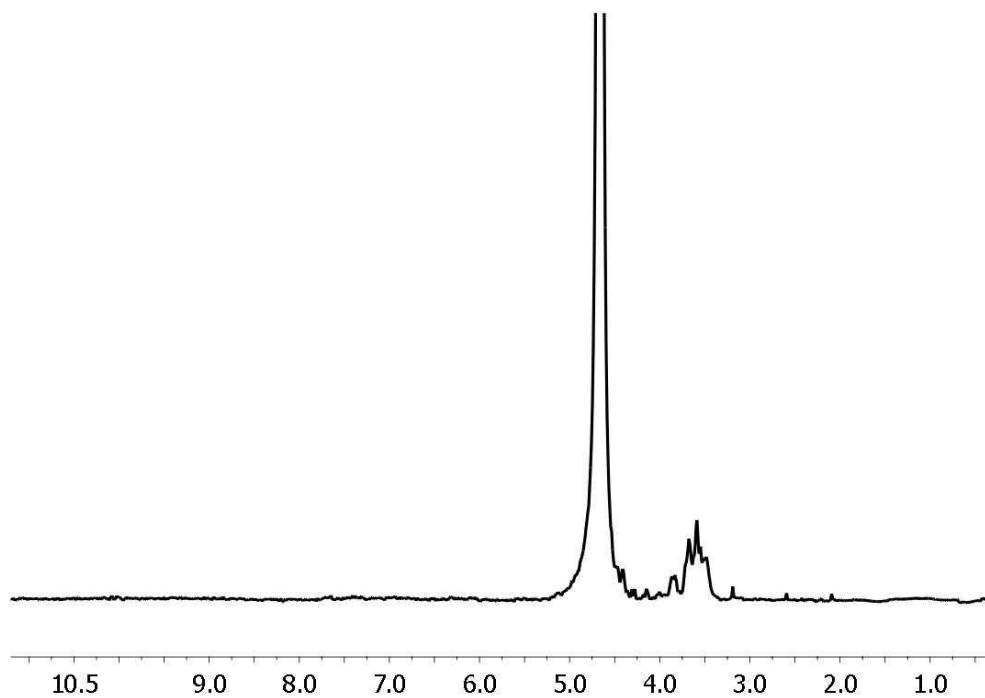

Figure 14. <sup>1</sup>H NMR of the de-protected polymer compound (9).

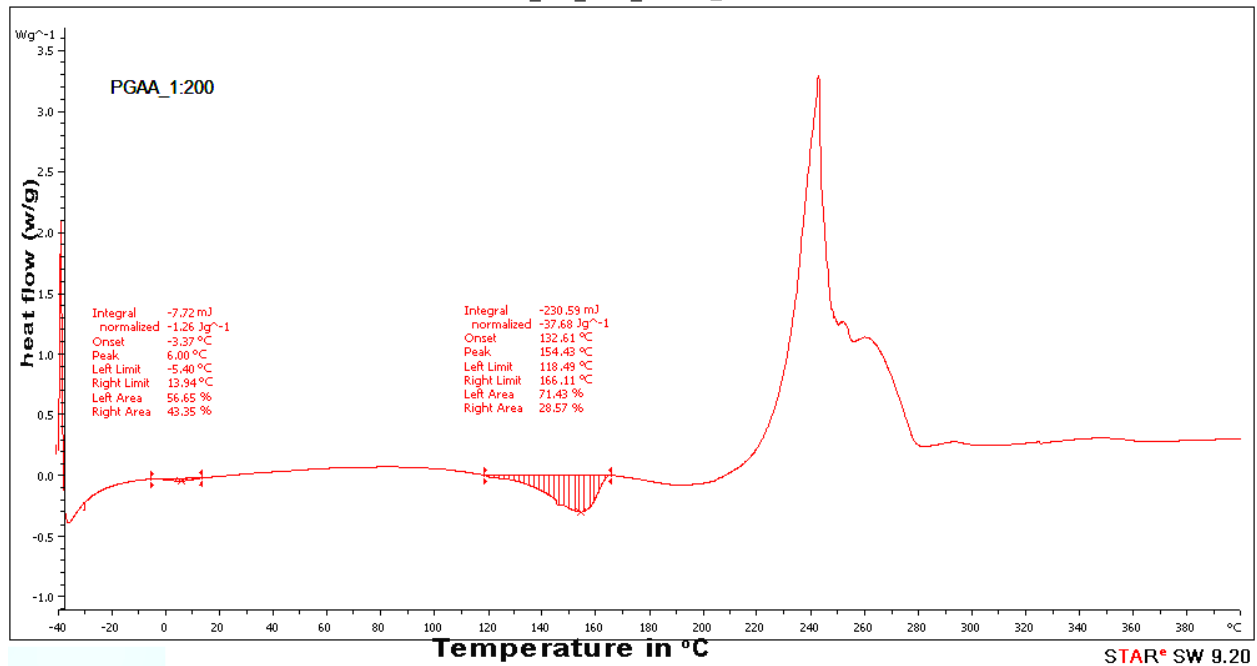

Figure 15. Representative DSC thermograph of poly glucosaminic acid.
